# Supplementary material for: The Role of the NADPH Oxidase NOX2 in Prion Pathogenesis
Source: PubMed Central journal article supplement (PMC4263757; doi:10.1371/journal.ppat.1004531), 2014-12-11
Supplement: ppat.1004531.s007.pdf [file ppat.1004531.s007.pdf]

**Table S1:** Basic characteristics of CJD and control patients.

| Patient n° | Gender | Age at death (years) | Duration of disease (months) | PrP <sup>Sc</sup> type |
|------------|--------|----------------------|------------------------------|------------------------|
| 1          | M      | 68                   | n.a.                         | 2                      |
| 2          | F      | 68                   | 6                            | 2                      |
| 3          | M      | 73                   | n.a.                         | 2                      |
| 4          | M      | 48                   | 8                            | 2                      |
| 6          | M      | 68                   | 5                            | 2                      |
| 5          | F      | 81                   | 10                           | 1                      |
| 7          | M      | 41                   | 2                            | 1                      |
| 8          | M      | 84                   | 9                            | 1                      |
| 9          | M      | 63                   | 3                            | 1                      |
| 10         | M      | 75                   | 7                            | 1                      |
| C1         | M      | 76                   | 12                           | neg.                   |
| C2         | M      | 84                   | n.a.                         | neg.                   |
| C3         | F      | 75                   | 14                           | neg.                   |

n.a.= not available
