# Supplementary material for: The Role of the NADPH Oxidase NOX2 in Prion Pathogenesis
Source: PubMed Central journal article supplement (PMC4263757; doi:10.1371/journal.ppat.1004531), 2014-12-11
Supplement: ppat.1004531.s008.pdf [file ppat.1004531.s008.pdf]

**Table S2.** 22L titration in C57BL/6 mice

| Dilution    | Sick/Total | Incubation time of recipient (days) | % mortality |
|-------------|------------|-------------------------------------|-------------|
| $10^{-5}$   | 4/4        | 168,170,188,199                     | 100         |
| $10^{-5.5}$ | 4/4        | 170,172,181,188                     | 100         |
| $10^{-6}$   | 3/4        | 172,233,236,>349                    | 75          |
| $10^{-6.5}$ | 3/4        | 220,227,262,>349                    | 75          |
| $10^{-7}$   | 1/4        | 199,>337,>337,>337                  | 25          |
| $10^{-7.5}$ | 0/4        | >337                                | 0           |
| $10^{-8}$   | 0/4        | >337                                | 0           |
| $10^{-8.5}$ | 1/4        | 234,>300                            | 25          |
| $10^{-9}$   | 0/4        | >300                                | 0           |

---

**8 log LD<sub>50</sub> units/ml in 10% homogenate**

---
